# Supplementary material
Source: PubMed Central journal article supplement (PMC2395044)
Supplement: supp_190_11_4050__1.pdf [file supp_190_11_4050__1.pdf]

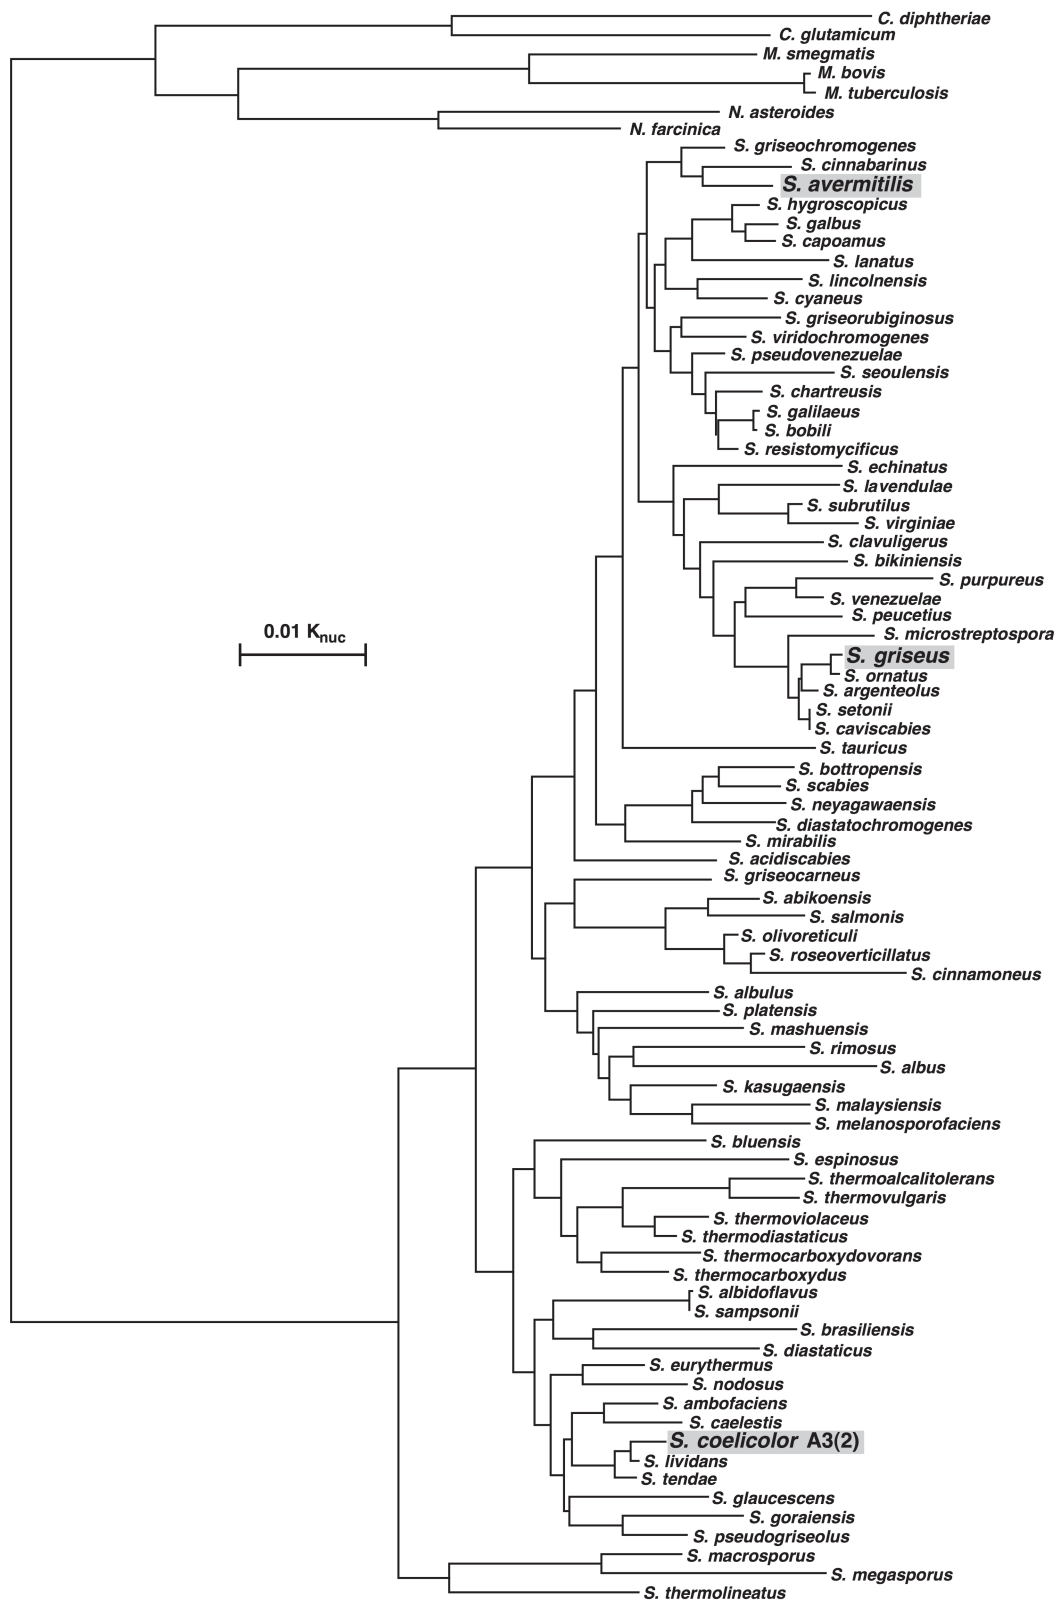

**Fig. S1. Phylogenetic tree of 16S ribosomal RNA of *Streptomyces* and related species.**  
The tree was constructed using the neighbor-joining method.
